# Supplementary material for: How well do general practitioners know their elderly patients’ social relations and feelings of loneliness?
Source: PubMed Central journal article supplement (PMC5828068; doi:10.1186/s12875-018-0721-x), 2018-02-26
Supplement: 12875_2018_721_MOESM1_ESM.pdf [file 12875_2018_721_MOESM1_ESM.pdf]

# Sociale relationer hos ældre patienter i almen praksis

## Spørgeskema til patienter

# Personlige forhold

## 1. Hvor lang var Deres skoleuddannelse?

|                                       |                          |
|---------------------------------------|--------------------------|
| Under 7 års skolegang                 | <input type="checkbox"/> |
| 7-8 års skolegang                     | <input type="checkbox"/> |
| 9-10 års skolegang                    | <input type="checkbox"/> |
| Studenter eksamen, HF, HH eller HTX   | <input type="checkbox"/> |
| Andet (herunder skolegang i udlandet) | <input type="checkbox"/> |

## 2. Bor du alene?

|     |                          |
|-----|--------------------------|
| Ja  | <input type="checkbox"/> |
| Nej | <input type="checkbox"/> |

## 3. Hvad er Deres ægteskabelige status rent juridisk

|                         |                          |
|-------------------------|--------------------------|
| Gift                    | <input type="checkbox"/> |
| Registreret partnerskab | <input type="checkbox"/> |
| Separeret               | <input type="checkbox"/> |
| Skilt                   | <input type="checkbox"/> |
| Enke/enkemand           | <input type="checkbox"/> |
| Ugift                   | <input type="checkbox"/> |

## 4. Hvorledes er Deres nuværende boligforhold?

|                                                 |                          |
|-------------------------------------------------|--------------------------|
| Bor i lejlighed (ejer-, andel eller lejerbolig) | <input type="checkbox"/> |
| Bor i pensionistbolig eller kollektivbolig      | <input type="checkbox"/> |
| Bor i beskyttet bolig                           | <input type="checkbox"/> |
| Bor i hus (ejer- eller lejerbolig)              | <input type="checkbox"/> |
| Bor på plejehjem                                | <input type="checkbox"/> |
| Andet, opgiv arten: _____                       | <input type="checkbox"/> |

## 5. Modtager du hjemmehjælp/hjemmesygeplejerske?

|                                   |                          |
|-----------------------------------|--------------------------|
| Nej                               | <input type="checkbox"/> |
| Ja                                | <input type="checkbox"/> |
| Hvis ja, hvor mange timer om ugen | <input type="text"/>     |

## 6. Hvor længe har De været tilknyttet denne lægepraksis

|            |                          |
|------------|--------------------------|
| Under 1 år | <input type="checkbox"/> |
| 1-5 år     | <input type="checkbox"/> |
| Over 5 år  | <input type="checkbox"/> |

# Helbred og sundhedsvaner

## 7. Hvordan synes De deres helbred er alt i alt

|             |                          |
|-------------|--------------------------|
| Fremragende | <input type="checkbox"/> |
| Vældig godt | <input type="checkbox"/> |
| Godt        | <input type="checkbox"/> |
| Mindre godt | <input type="checkbox"/> |
| Dårligt     | <input type="checkbox"/> |

## 8. Angiv ved at sætte et X i én af kasserne i hver gruppe, hvilke udsagn, der bedst beskriver Deres helbredstilstand i dag.

### Bevægelighed

|                                           |                          |
|-------------------------------------------|--------------------------|
| Jeg har ingen problemer med at gå omkring | <input type="checkbox"/> |
| Jeg har nogle problemer med at gå omkring | <input type="checkbox"/> |
| Jeg er bundet til sengen                  | <input type="checkbox"/> |

### Personlig pleje

|                                                             |                          |
|-------------------------------------------------------------|--------------------------|
| Jeg har ingen problemer med min personlige pleje            | <input type="checkbox"/> |
| Jeg har nogle problemer med at vaske mig eller klæde mig på | <input type="checkbox"/> |
| Jeg kan ikke vaske mig eller klæde mig på                   | <input type="checkbox"/> |

### Sædvanlige aktiviteter (f.eks. arbejde, husarbejde, familie- eller fritidsaktiviteter)

|                                                                   |                          |
|-------------------------------------------------------------------|--------------------------|
| Jeg har ingen problemer med at udføre mine sædvanlige aktiviteter | <input type="checkbox"/> |
| Jeg har nogle problemer med at udføre mine sædvanlige aktiviteter | <input type="checkbox"/> |
| Jeg kan ikke udføre mine sædvanlige aktiviteter                   | <input type="checkbox"/> |

### Smerter/ubehag

|                                       |                          |
|---------------------------------------|--------------------------|
| Jeg har ingen smerter eller ubehag    | <input type="checkbox"/> |
| Jeg har moderate smerter eller ubehag | <input type="checkbox"/> |
| Jeg har ekstreme smerter eller ubehag | <input type="checkbox"/> |

### Angst/depression

|                                            |                          |
|--------------------------------------------|--------------------------|
| Jeg er ikke ængstelig eller deprimeret     | <input type="checkbox"/> |
| Jeg er moderat ængstelig eller deprimeret  | <input type="checkbox"/> |
| Jeg er ekstremt ængstelig eller deprimeret | <input type="checkbox"/> |

## Deres helbredstilstand i dag

For at hjælpe folk med at udtrykke, hvor god eller dårlig en helbredstilstand er, har vi tegnet en skala (næsten ligesom et termometer), hvor den bedste helbredstilstand du kan forestille dig er markeret med 100, og den værste helbredstilstand du kan forestille dig er markeret med 0.

**Vi beder Dem angive på denne skala, hvor god eller dårlig De mener Deres egen helbredstilstand er i dag.**

Angiv dette ved at tegne en streg fra kassen nedenfor til et hvilket som helst punkt på skalaen, der viser, hvor god eller dårlig deres helbredstilstand er i dag.

Deres  
helbredstilstand  
i dag

Bedst tænkelige  
helbredstilstand

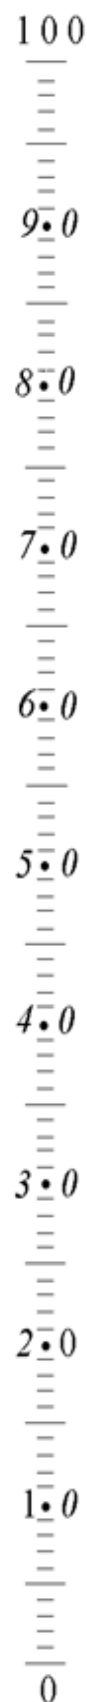

Værst tænkelige  
helbredstilstand

### 10. Hvorledes vil De bedømme Deres hukommelse?

|              |                          |
|--------------|--------------------------|
| Virkelig god | <input type="checkbox"/> |
| God          | <input type="checkbox"/> |
| Nogenlunde   | <input type="checkbox"/> |
| Dårlig       | <input type="checkbox"/> |
| Meget dårlig | <input type="checkbox"/> |

### 11. Kan De normalt uden besvær, med lidt besvær, med meget besvær eller slet ikke gøre følgende

| (Sæt ét X i hver linje)                                                                                                             | Ja, uden besvær          | Ja, med lidt besvær      | Ja, med meget besvær     | Nej slet ikke            |
|-------------------------------------------------------------------------------------------------------------------------------------|--------------------------|--------------------------|--------------------------|--------------------------|
| Læse en almindelig avistekst (evt. med briller, hvis det normalt bruges)?                                                           | <input type="checkbox"/> | <input type="checkbox"/> | <input type="checkbox"/> | <input type="checkbox"/> |
| Høre, hvad der bliver sagt under en normal samtale mellem tre eller flere personer (evt. med høreapparat, hvis det normalt bruges)? | <input type="checkbox"/> | <input type="checkbox"/> | <input type="checkbox"/> | <input type="checkbox"/> |
| Gå 400 meter uden at hvile?                                                                                                         | <input type="checkbox"/> | <input type="checkbox"/> | <input type="checkbox"/> | <input type="checkbox"/> |
| Gå op eller ned ad en trappe fra en etage til en anden uden at hvile?                                                               | <input type="checkbox"/> | <input type="checkbox"/> | <input type="checkbox"/> | <input type="checkbox"/> |
| Bære 5 kg (f.eks. indkøbsposer)?                                                                                                    | <input type="checkbox"/> | <input type="checkbox"/> | <input type="checkbox"/> | <input type="checkbox"/> |

### 12. Ryger De

|                            |                          |
|----------------------------|--------------------------|
| Ja, hver dag               | <input type="checkbox"/> |
| Ja, mindst én gang om ugen | <input type="checkbox"/> |
| Ja, sjældnere end hver uge | <input type="checkbox"/> |
| Nej, jeg holdt op          | <input type="checkbox"/> |
| Nej, jeg aldrig røget      | <input type="checkbox"/> |

### 13. Hvor meget af følgende har De i gennemsnit drukket om ugen de sidste 12 måneder?

|                                           | Skriv antal          |
|-------------------------------------------|----------------------|
| Antal øl om ugen                          | <input type="text"/> |
| Antal glas vin om ugen (1 flaske =6 glas) | <input type="text"/> |
| Antal glas spiritus (2 cl.) om ugen       | <input type="text"/> |

# Relationer med andre mennesker

## 14. Hvor ofte har De inden for den sidste måned haft besøg af venner, naboer eller familie i Deres hjem?

|                            |                          |
|----------------------------|--------------------------|
| Mindst én gang om ugen     | <input type="checkbox"/> |
| Mindre end én gang om ugen | <input type="checkbox"/> |
| Aldrig                     | <input type="checkbox"/> |
| Ved ikke                   | <input type="checkbox"/> |

## 15. Hvor ofte har De inden for den sidste måned været på besøg i andre menneskers hjem?

|                            |                          |
|----------------------------|--------------------------|
| Mindst én gang om ugen     | <input type="checkbox"/> |
| Mindre end én gang om ugen | <input type="checkbox"/> |
| Aldrig                     | <input type="checkbox"/> |
| Ved ikke                   | <input type="checkbox"/> |

## 16. Hvor ofte har De inden for den sidste måned deltaget i fritidsaktiviteter uden for Deres eget hjem (fx undervisning, foredrag, foreningsliv, klub, dagcenter, kirke, biograf, teater, museum, andet kulturelt)?

|                            |                          |
|----------------------------|--------------------------|
| Mindst én gang om ugen     | <input type="checkbox"/> |
| Mindre end én gang om ugen | <input type="checkbox"/> |
| Aldrig                     | <input type="checkbox"/> |
| Ved ikke                   | <input type="checkbox"/> |

## 17. Sker det nogensinde, at De er alene, selvom De mest har lyst til at være sammen med andre?

|                     |                          |
|---------------------|--------------------------|
| Ja ofte             | <input type="checkbox"/> |
| Ja, en gang imellem | <input type="checkbox"/> |
| Ja, men sjældent    | <input type="checkbox"/> |
| Nej                 | <input type="checkbox"/> |

## 18. Har De nogen at tale med, hvis De har problemer eller brug for støtte

|                                |                          |
|--------------------------------|--------------------------|
| Ja, ofte                       | <input type="checkbox"/> |
| Ja, for det meste              | <input type="checkbox"/> |
| Ja, nogen gange                | <input type="checkbox"/> |
| Nej aldrig eller næsten aldrig | <input type="checkbox"/> |

**19. Sker det nogensinde, at De føler dem ensom?**

|                     |                          |
|---------------------|--------------------------|
| Ja ofte             | <input type="checkbox"/> |
| Ja, en gang imellem | <input type="checkbox"/> |
| Ja, men sjældent    | <input type="checkbox"/> |
| Nej                 | <input type="checkbox"/> |

**Hvis De ved spørgsmål 19 har svaret, at De "Ja ofte" eller "Ja, en gang imellem" føler Dem ensom, bedes De besvare det næste spørgsmål**

**20. Har De talt med Deres læge om, at De føler dem ensom**

|     |                          |
|-----|--------------------------|
| Ja  | <input type="checkbox"/> |
| Nej | <input type="checkbox"/> |

**Tak for at De ville medvirke**
