# Supplementary material for: How well do general practitioners know their elderly patients’ social relations and feelings of loneliness?
Source: PubMed Central journal article supplement (PMC5828068; doi:10.1186/s12875-018-0721-x), 2018-02-26
Supplement: 12875_2018_721_MOESM2_ESM.pdf [file 12875_2018_721_MOESM2_ESM.pdf]

# Sociale relationer hos ældre patienter i almen praksis

**Spørgeskema til lægen**

**Udfyldes før konsultationen**

**1. Hvor ofte tror du, at patienten inden for den sidste måned har haft besøg af venner, naboer eller familie i sit hjem?**

|                            |                          |
|----------------------------|--------------------------|
| Mindst én gang om ugen     | <input type="checkbox"/> |
| Mindre end én gang om ugen | <input type="checkbox"/> |
| Aldrig                     | <input type="checkbox"/> |
| Ved ikke                   | <input type="checkbox"/> |

**2. Hvor ofte tror du, at patienten inden for den sidste måned har været på besøg i andre menneskers hjem?**

|                            |                          |
|----------------------------|--------------------------|
| Mindst én gang om ugen     | <input type="checkbox"/> |
| Mindre end én gang om ugen | <input type="checkbox"/> |
| Aldrig                     | <input type="checkbox"/> |
| Ved ikke                   | <input type="checkbox"/> |

**3. Hvor ofte tror du, at patienten inden for den sidste måned har deltaget i fritidsaktiviteter uden for eget hjem (fx undervisning, foredrag, foreningsliv, klub, dagcenter, kirke, biograf, teater, museum, andet kulturelt)?**

|                            |                          |
|----------------------------|--------------------------|
| Mindst én gang om ugen     | <input type="checkbox"/> |
| Mindre end én gang om ugen | <input type="checkbox"/> |
| Aldrig                     | <input type="checkbox"/> |
| Ved ikke                   | <input type="checkbox"/> |

**4. Tror du, at din patient nogensinde er alene, selvom han/hun mest har lyst til at være sammen med andre?**

|                     |                          |
|---------------------|--------------------------|
| Ja, ofte            | <input type="checkbox"/> |
| Ja, en gang imellem | <input type="checkbox"/> |
| Ja, men sjældent    | <input type="checkbox"/> |
| Nej                 | <input type="checkbox"/> |

**5. Tror du, at din patient nogensinde føler sig ensom?**

|                     |                          |
|---------------------|--------------------------|
| Ja ofte             | <input type="checkbox"/> |
| Ja, en gang imellem | <input type="checkbox"/> |
| Ja, men sjældent    | <input type="checkbox"/> |
| Nej                 | <input type="checkbox"/> |

**6. Tror du, at din patient har nogen at tale med, hvis han/hun har problemer eller brug for støtte?**

|                                |                          |
|--------------------------------|--------------------------|
| Ja, ofte                       | <input type="checkbox"/> |
| Ja, for det meste              | <input type="checkbox"/> |
| Ja, nogen gange                | <input type="checkbox"/> |
| Nej aldrig eller næsten aldrig | <input type="checkbox"/> |

**7. I tilfælde af, at din patient lider af kroniske sygdomme bedes disse venligst angives i listen nedenfor**

|    |
|----|
| 1. |
| 2. |
| 3. |
| 4. |
| 5. |
| 6. |
| 7. |
| 8. |

Print eventuelt liste fra lægesystem. **HUSK at skrive deltagernummer på printet**
